# Supplementary material for: First-principles simulation of X-ray spectra of graphdiyne and graphdiyne oxides at the carbon K-edge
Source: Royal Society of Chemistry journal article supplement (doi:10.1039/d3cp03193d), 2023-01-01
Supplement: d3cp03193d1.pdf [file d3cp03193d1.pdf]

**Supplementary Materials for: First-Principles Simulation of X-ray Spectra of Graphdiyne  
and Graphdiyne Oxides at the Carbon K-edge**

Jing Ming,<sup>a‡</sup> Jun-Rong Zhang,<sup>b‡</sup> Xiu-Neng Song,<sup>a</sup> Xin Li,<sup>c</sup> Weijie Hua,<sup>b\*</sup> Yong Ma<sup>a\*</sup>

<sup>‡</sup> *These authors contributed equally to this work.*

<sup>a</sup> *School of Physics and Electronics, Shandong Normal University, 250358 Jinan, China*

<sup>b</sup> *MIIT Key Laboratory of Semiconductor Microstructure and Quantum Sensing, Department of Applied Physics, School of Science, Nanjing University of Science and Technology, 210094 Nanjing, China*

<sup>c</sup> *Hefei National Research Center for Physical Sciences at the Microscale, University of Science and Technology of China, 230026 Hefei, China*

\* *Corresponding authors. E-mail addresses: [wjhua@njust.edu.cn](mailto:wjhua@njust.edu.cn)(W. Hua); [mayong@sdu.edu.cn](mailto:mayong@sdu.edu.cn) (Y. Ma)*

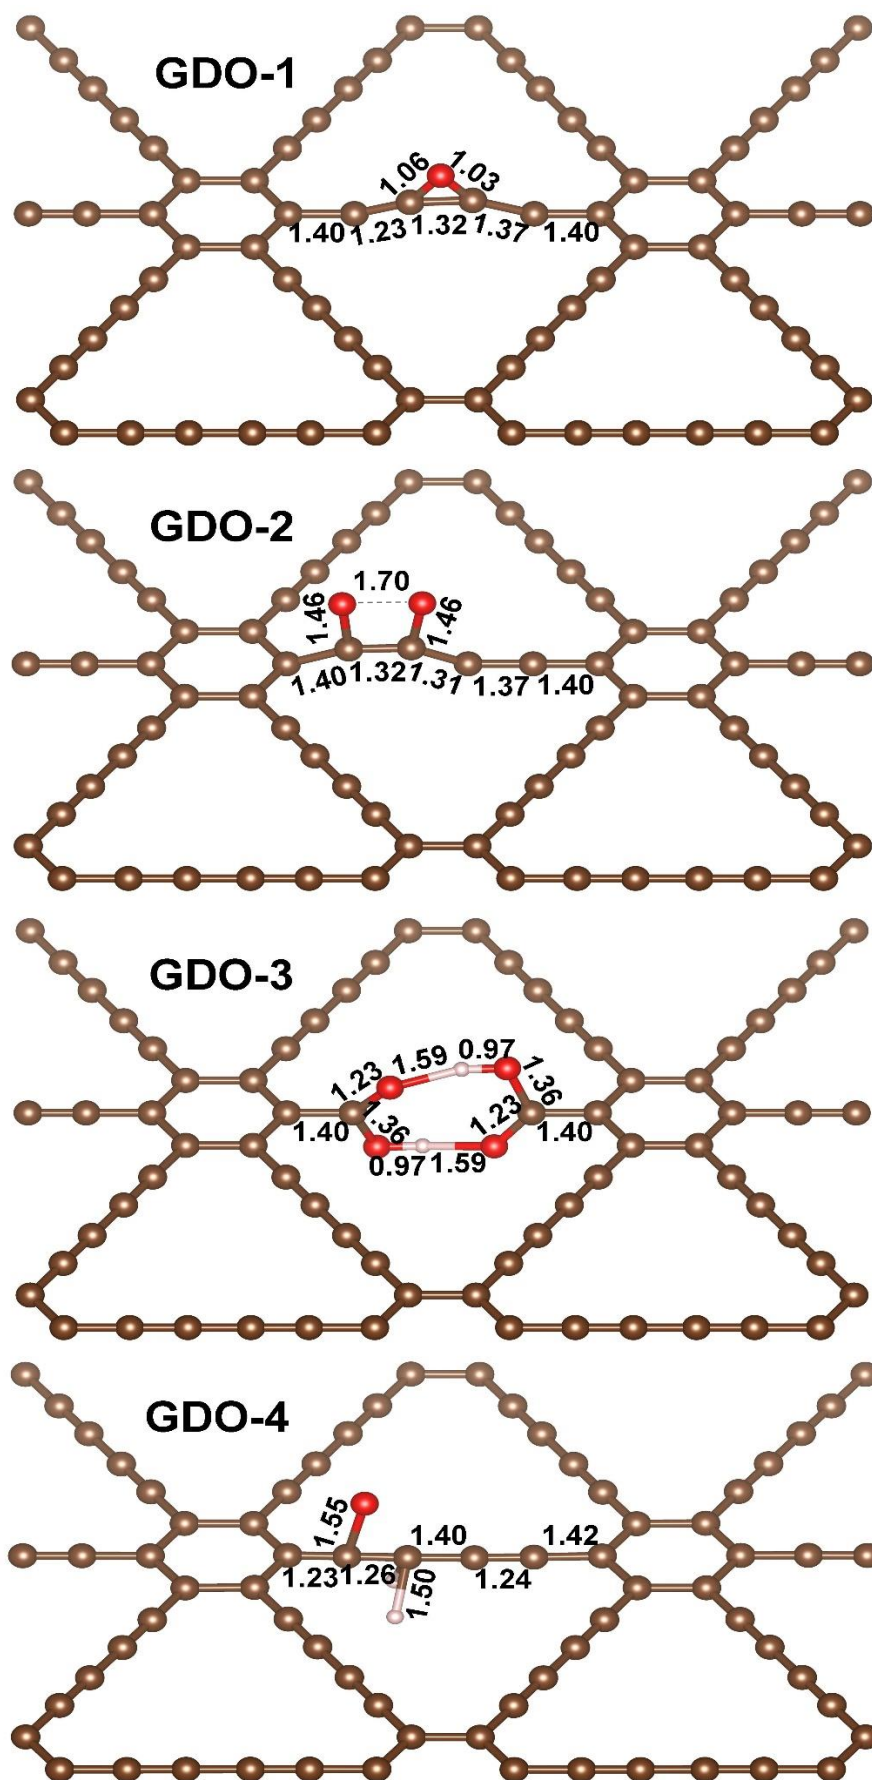

Fig. S1. The pre-optimization structures contain bond length (Å) information.

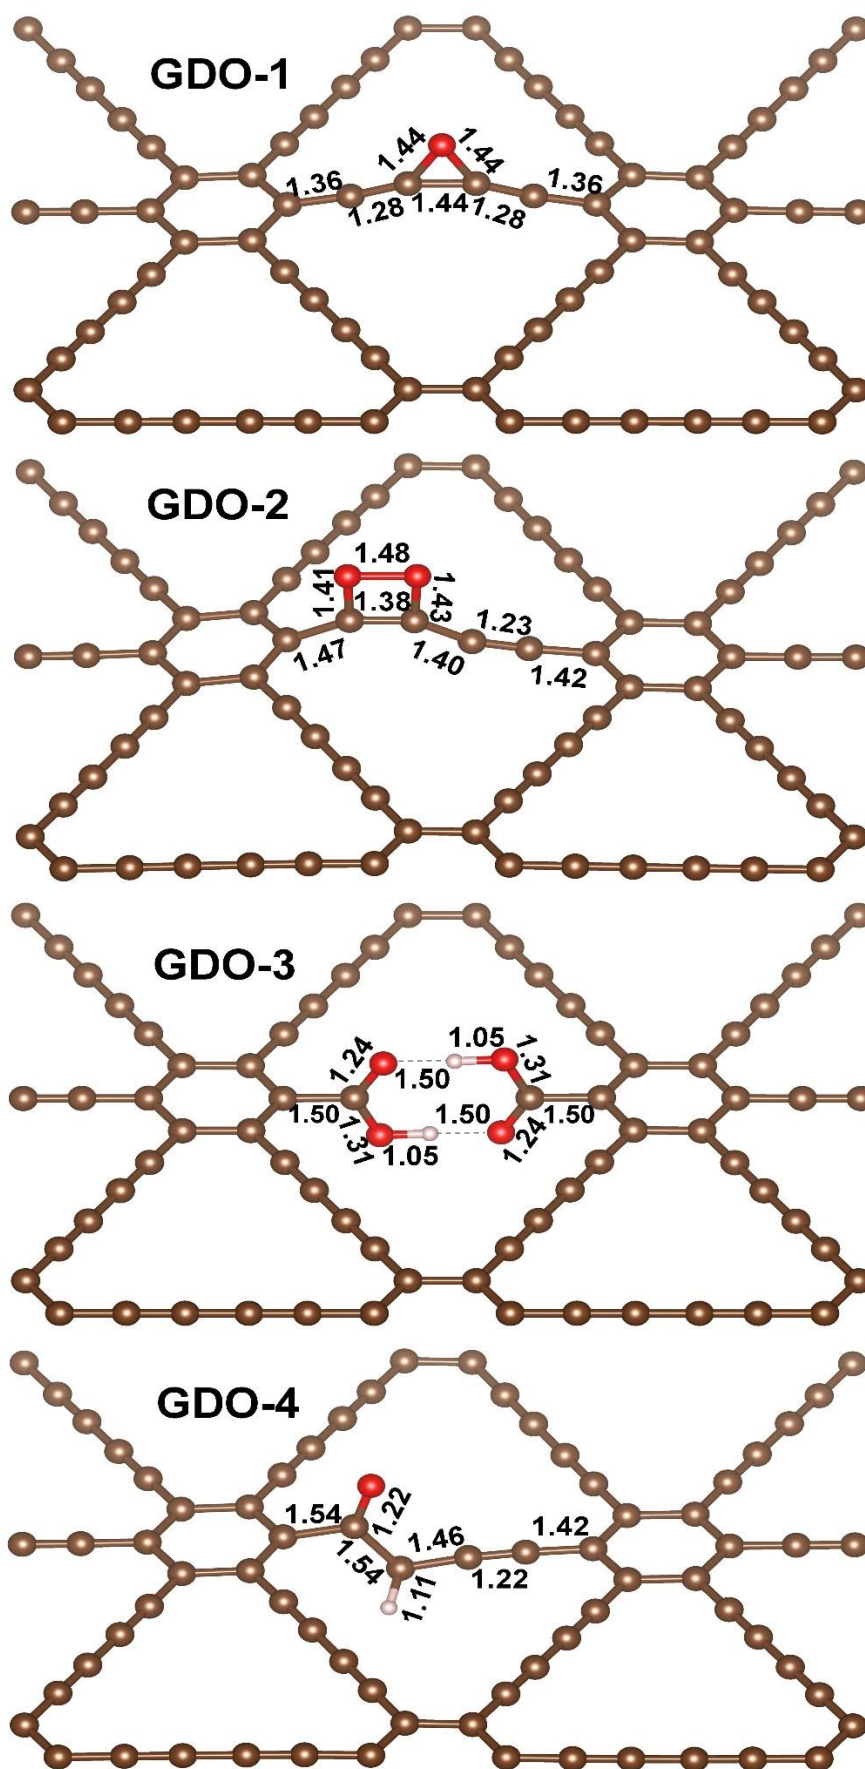

Fig. S2. The post-optimization structures contain bond length (Å) information.

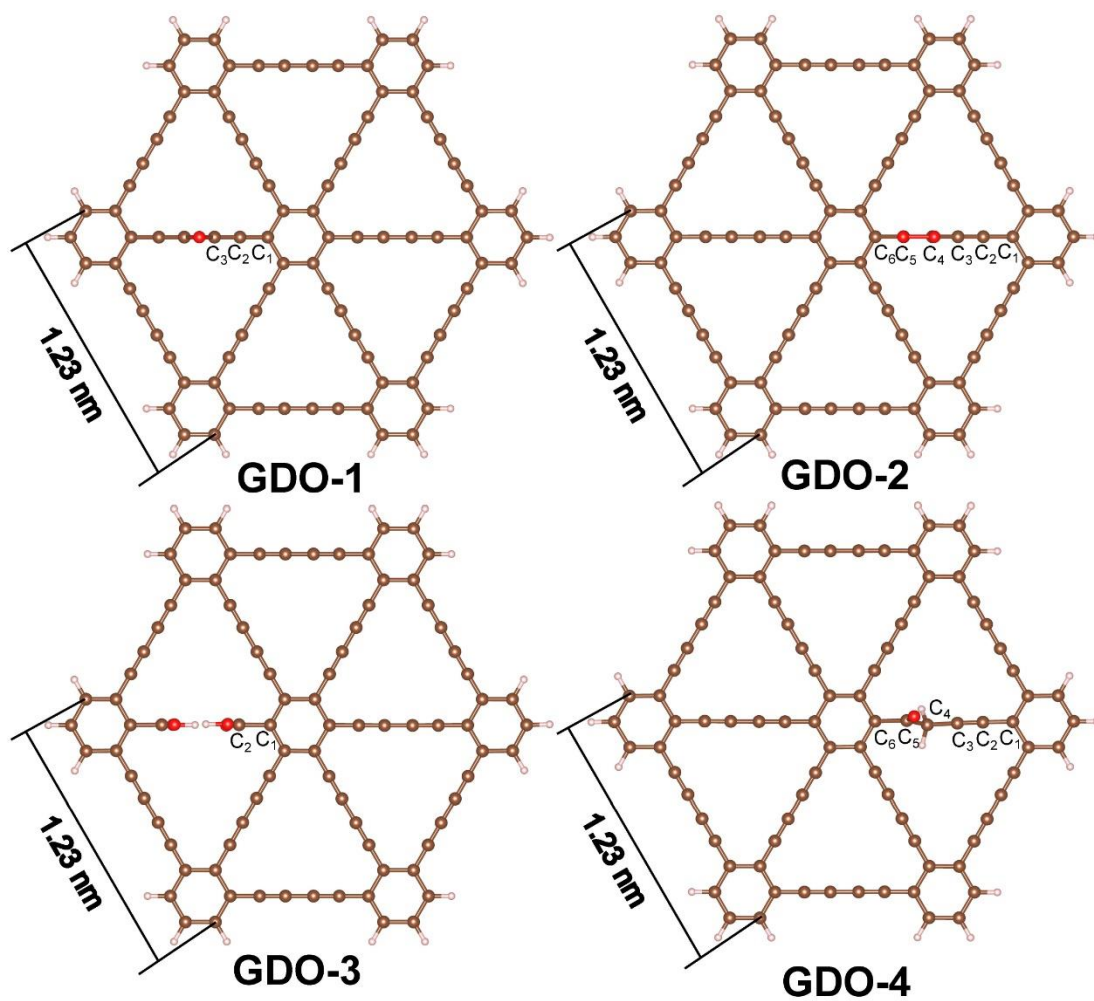

Fig. S3. Cluster models used to calculate the IPs for four different graphdiyne oxides (GDOs) and their sizes are labeled. The excited atoms are labeled C<sub>1</sub>, C<sub>2</sub>, C<sub>3</sub>.....

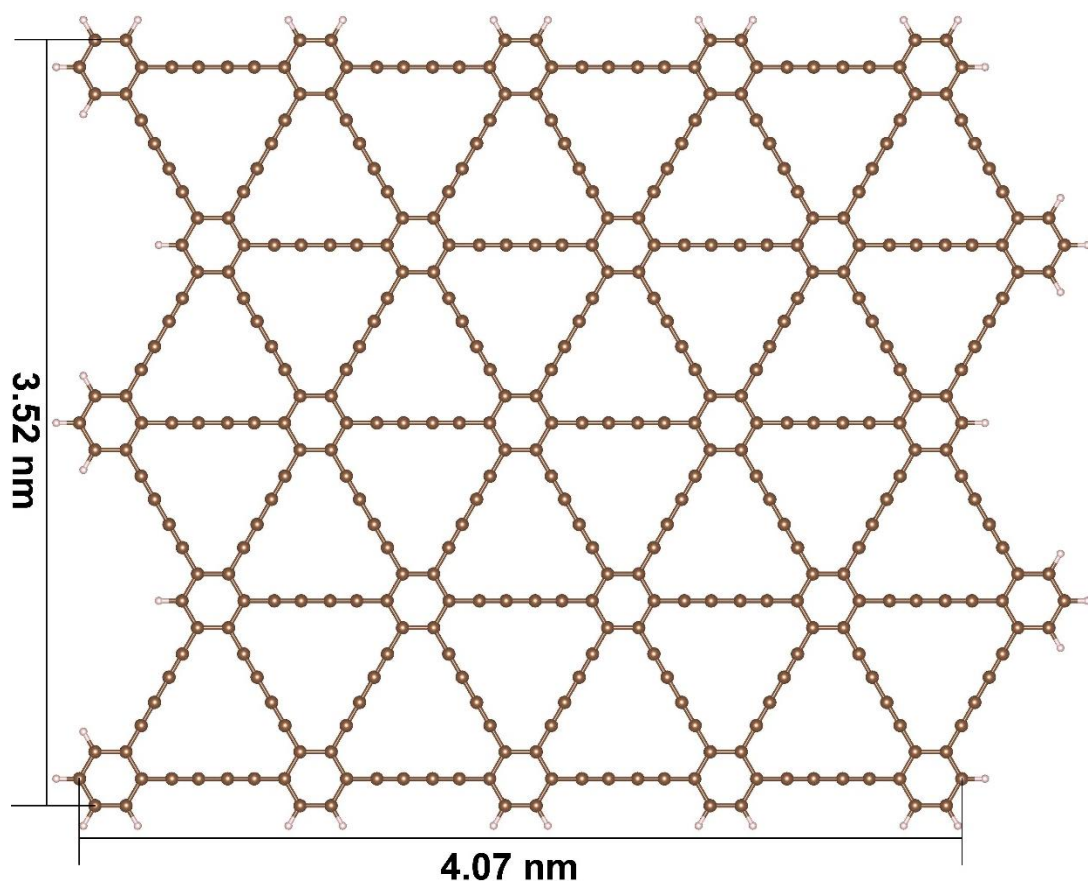

**Fig. S4.** Size B: the vertical length of GDY is 3.52nm between the bottom carbon atoms and the top carbon atoms; the parallel length of GDY is 4.07nm from the left carbon atoms to the right carbon atoms.

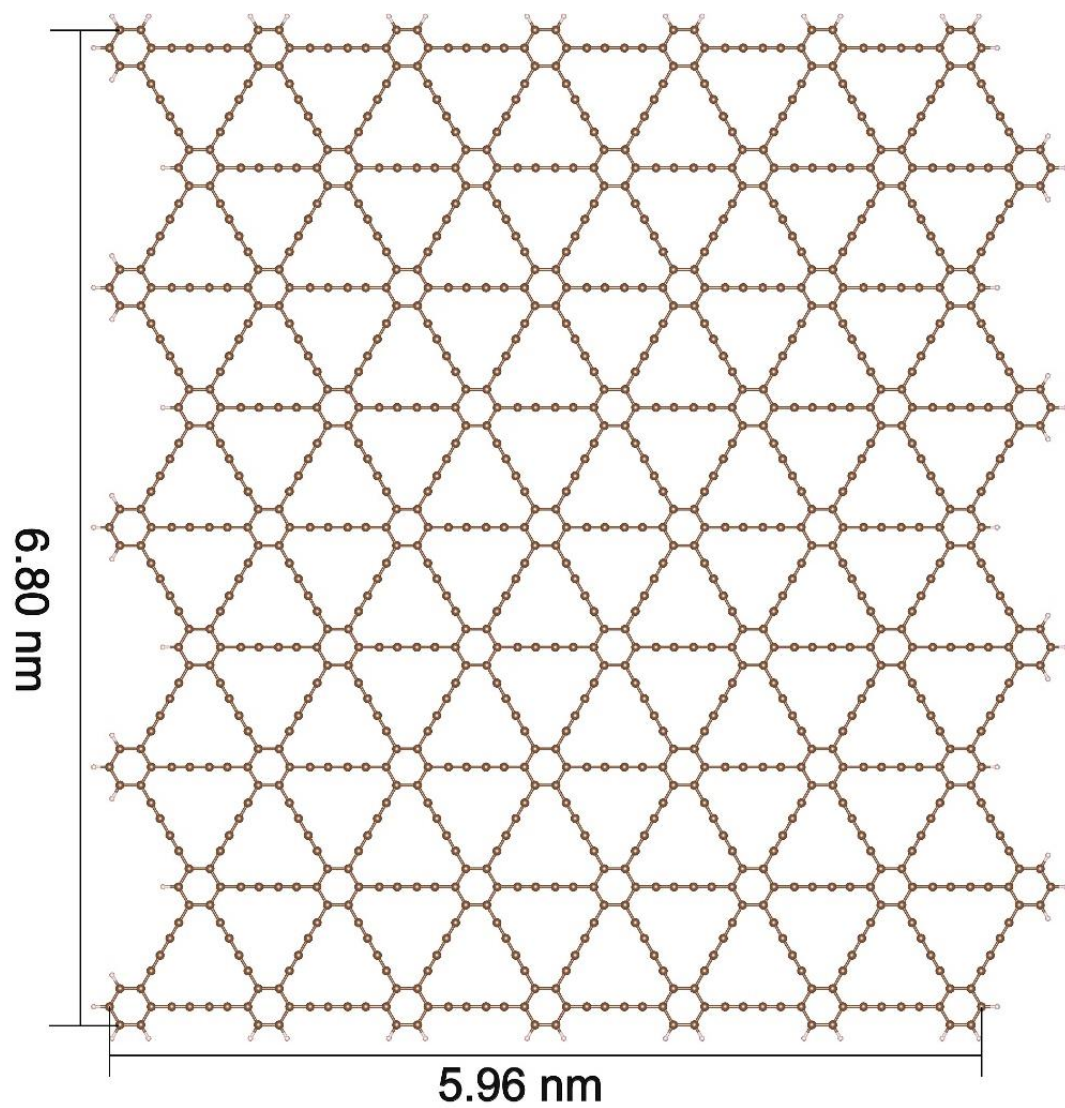

**Fig. S5.** Size D with 6.80nm of the vertical length and 5.96nm of the parallel length similar to Fig. S2.
